# Supplementary material
Source: Royal Society of Chemistry journal article supplement (doi:10.1039/d6nj00047a)
Supplement: d6nj00047a1.pdf [file d6nj00047a1.pdf]

## Supplementary Material

### **Tuning the Photocatalytic Activity of Ti-based LDH via Divalent Cations for Enhanced Tetracycline Hydrochloride Degradation**

Xiangtai Zhang<sup>1</sup>, Tao Feng<sup>1,2\*</sup>, Si Wu<sup>1,2\*</sup>, Tingpeng Chen<sup>1</sup>, Yuqi Tang<sup>1</sup>, Yu Shi<sup>3</sup>

<sup>1</sup> College of Resources and Environmental Engineering, Wuhan University of Science and Technology, Wuhan, 430081, China

<sup>2</sup> Hubei Key Laboratory for Efficient Utilization and Agglomeration of Metallurgic Mineral Resources. Wuhan University of Science and Technology, Wuhan, 430081, China

<sup>3</sup> Wuhan Jincheng Yida Technology Development Co., Ltd. Wuhan, 430081, China

\*Corresponding Authors

E-mail: fengtaowhu@163.com (T. Feng)

E-mail: siwu@wust.edu.cn (S. Wu)

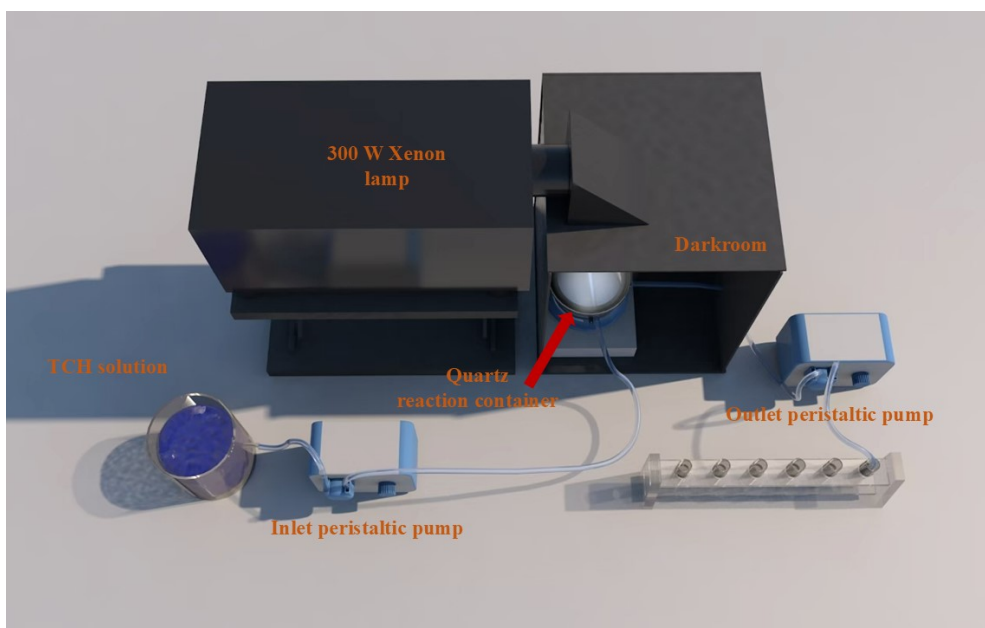

**Fig. S1 Diagram of the dynamic adsorption photocatalytic device.**

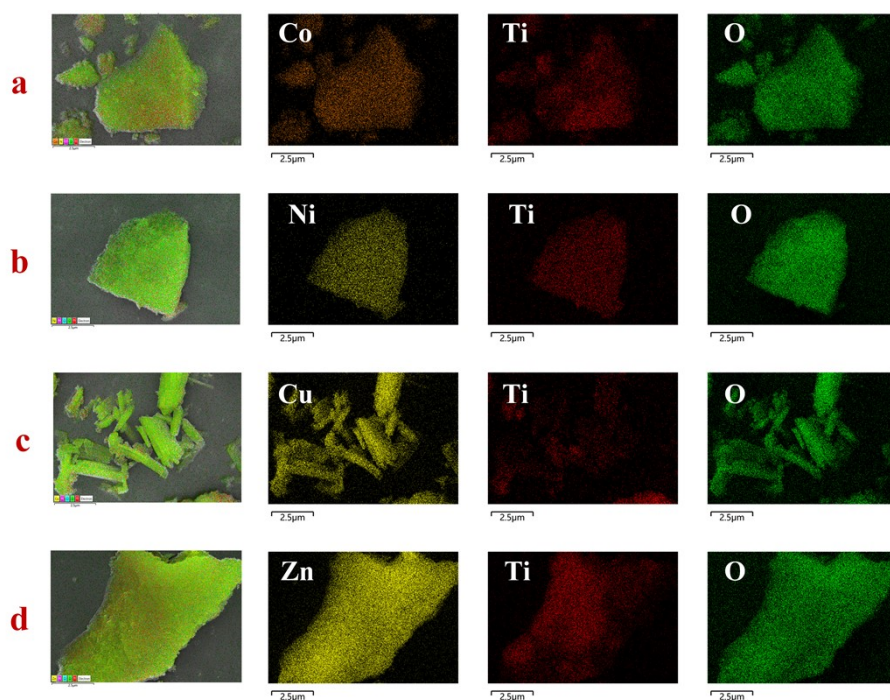

**Fig. S2 EDS element distribution diagrams of different MTi-LDHs (a: CoTi-LDH; b: NiTi-LDH; c: CuTi-LDH; d: ZnTi-LDH).**

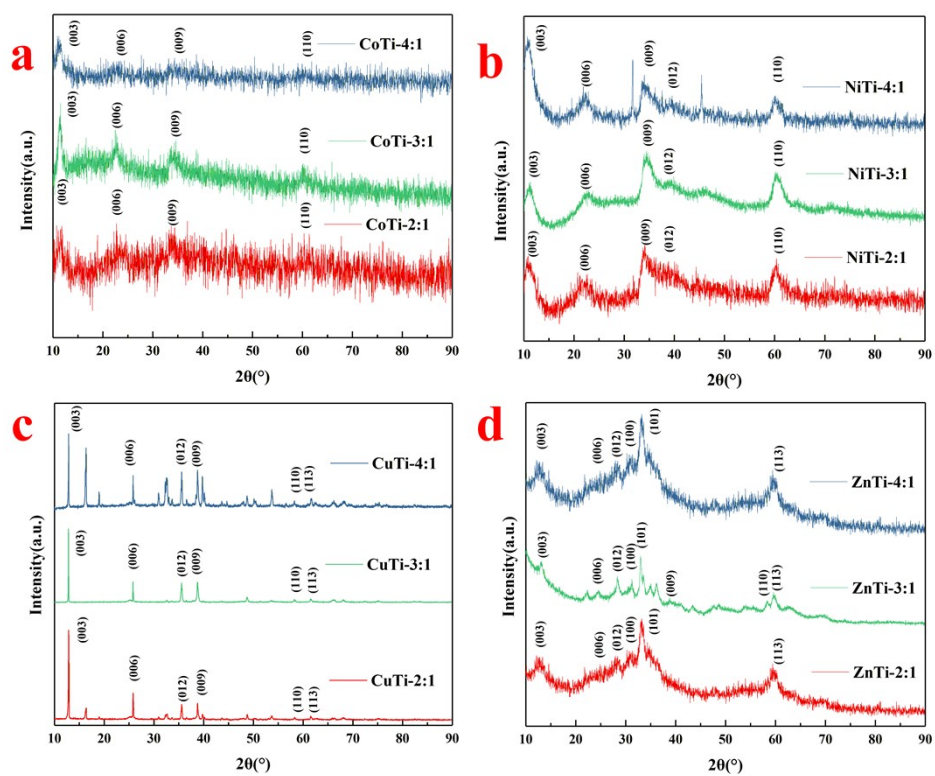

Fig. S3 XRD patterns of MTi-LDHs with different  $M^{2+}$ :Ti (a: CoTi-LDH; b: NiTi-LDH; c: CuTi-LDH; d: ZnTi-LDH).

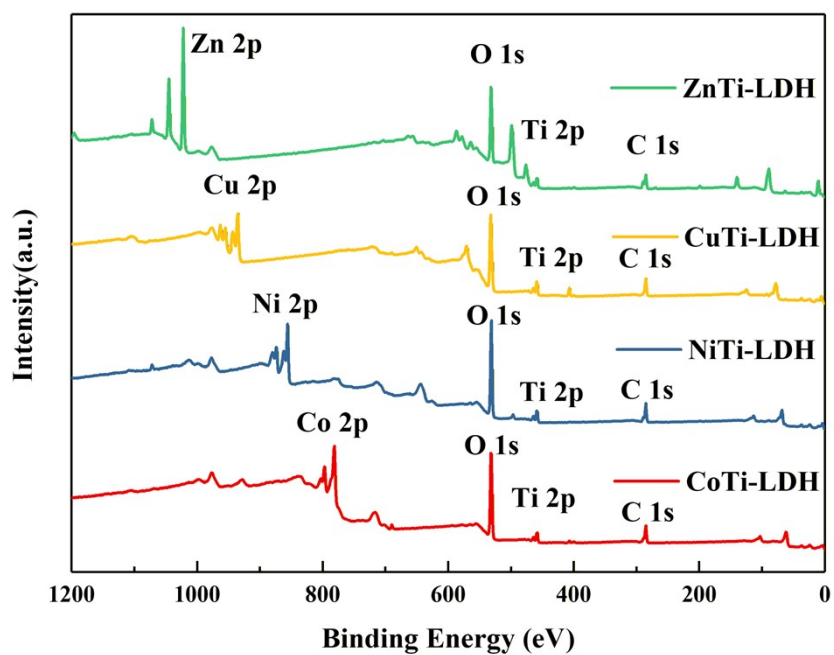

Fig. S4 XPS survey of MTi-LDHs.

**Table S1 The XPS Peak positions of each element in MTi-LDHs.**

| MTi-LDH  | C 1s(eV) |        | O 1s(eV) |        | Ti 2p(eV) |           | M 2p<br>(M=Co,Ni,Cu,Zn)(eV) |          |
|----------|----------|--------|----------|--------|-----------|-----------|-----------------------------|----------|
|          | C 1s     | C 1s   | O 1s     | O 1s   | Ti 2p 1/2 | Ti 2p 3/2 | M 2p 1/2                    | M 2p 3/2 |
| CoTi-LDH | 288.72   | 284.80 | 531.31   | 529.61 | 463.85    | 458.10    | 796.63                      | 780.82   |
| NiTi-LDH | 288.81   | 284.80 | 530.92   | 529.56 | 463.95    | 458.15    | 873.05                      | 855.59   |
| CuTi-LDH | 288.36   | 284.80 | 531.07   | 529.59 | 464.01    | 458.29    | 954.57                      | 934.86   |
| ZnTi-LDH | 288.22   | 284.80 | 531.4    | 529.59 | 463.82    | 458.16    | 1044.89                     | 1022.73  |

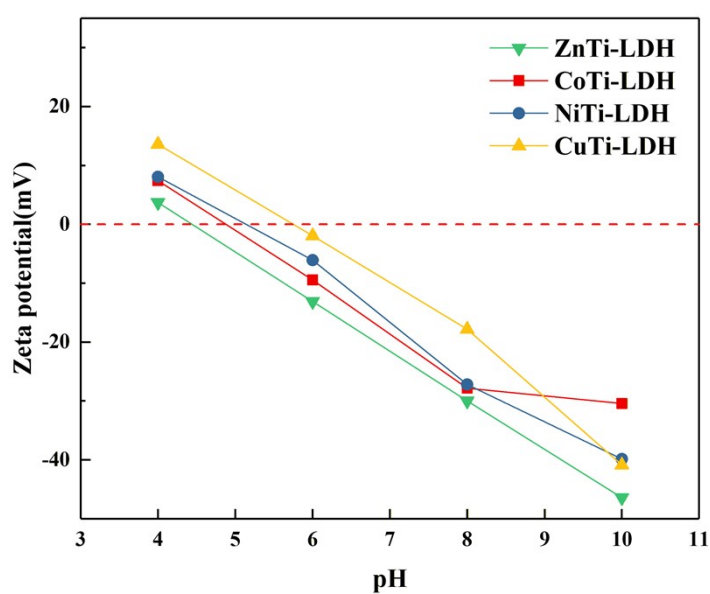

**Fig. S5 Zeta potential curve for different MTi-LDHs.**

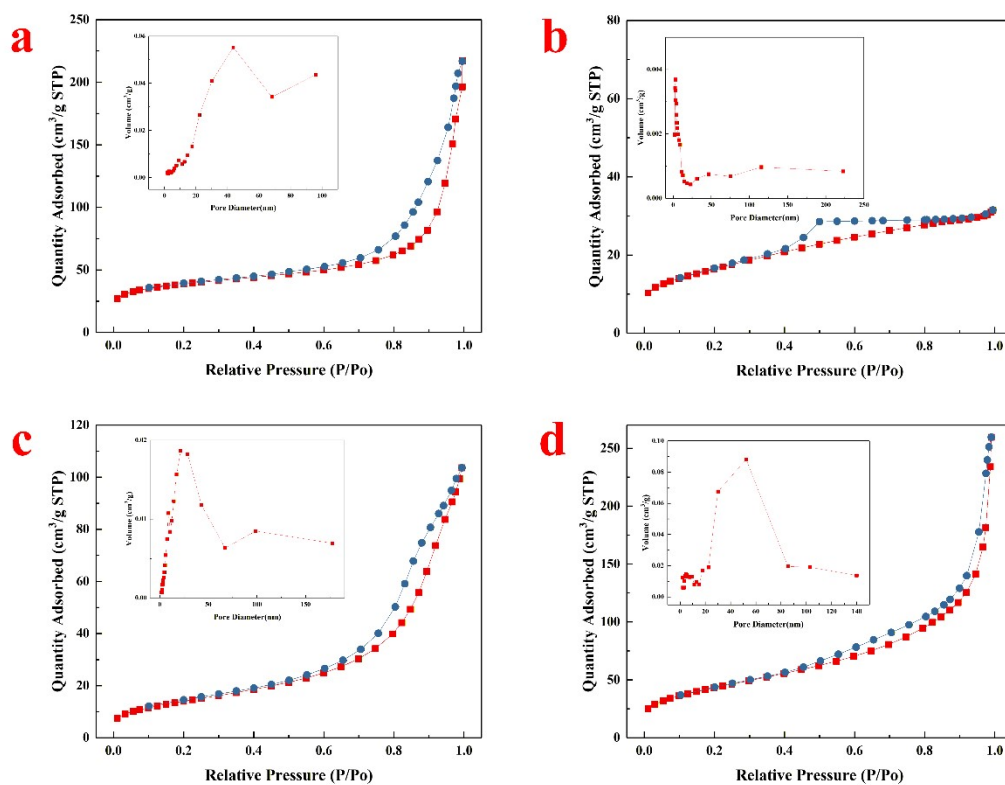

**Fig. S6 Nitrogen adsorption-desorption isotherms and corresponding pore size distribution curves of MTi-LDHs (a: CoTi-LDH; b: NiTi-LDH; c: CuTi-LDH; d: ZnTi-LDH).**

**Table S2 Textural parameters obtained from BET of MTi-LDHs.**

| Sample   | BET Surface Area<br>(m <sup>2</sup> /g) | BJH volume of<br>pores (cm <sup>3</sup> /g) | Average pore<br>diameter (nm) |
|----------|-----------------------------------------|---------------------------------------------|-------------------------------|
| CoTi-LDH | 139.2                                   | 0.28                                        | 9.3                           |
| NiTi-LDH | 58.9                                    | 0.05                                        | 3.3                           |
| CuTi-LDH | 51.8                                    | 0.16                                        | 12.4                          |
| ZnTi-LDH | 156.8                                   | 0.41                                        | 10.2                          |

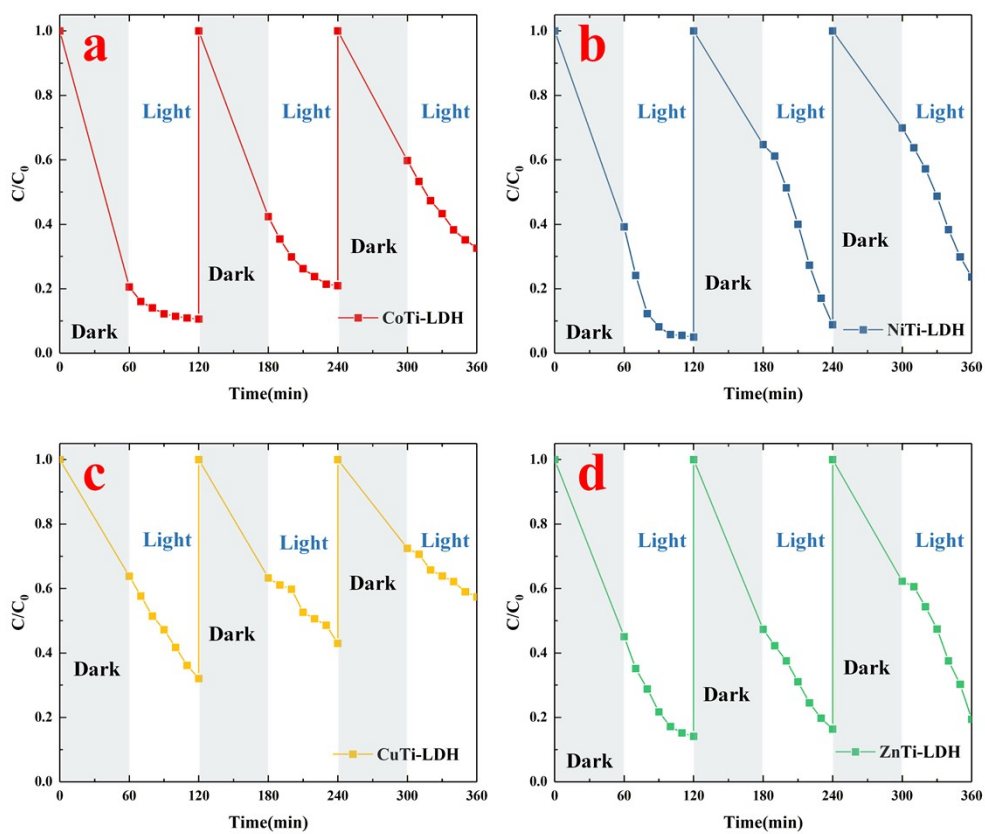

**Fig. S7 Recycling Performance of MTi-LDH in the photocatalytic degradation of TCH (a: CoTi-LDH; b: NiTi-LDH; c: CuTi-LDH; d: ZnTi-LDH).**

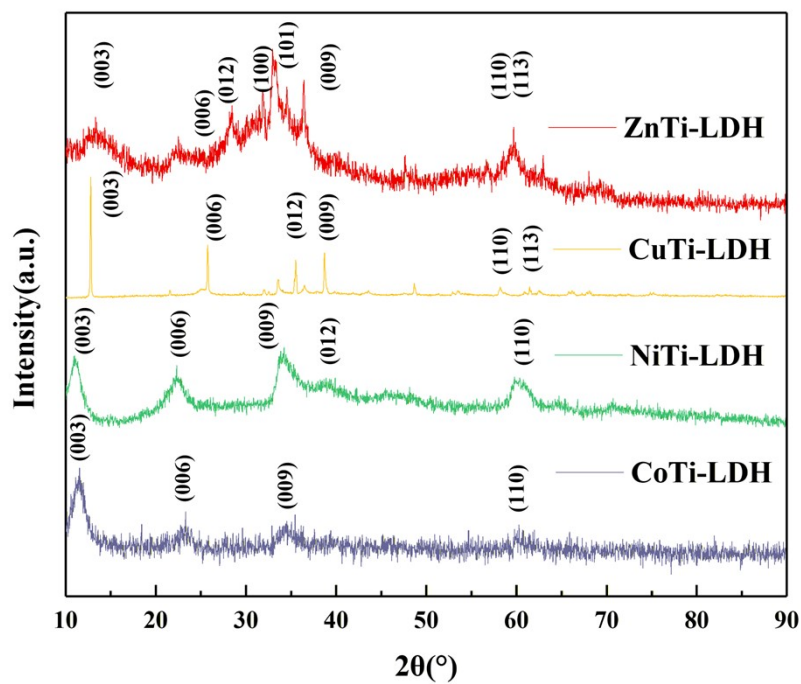

Fig. S8 The XRD patterns of the MTi-LDH samples after TCH degradation.

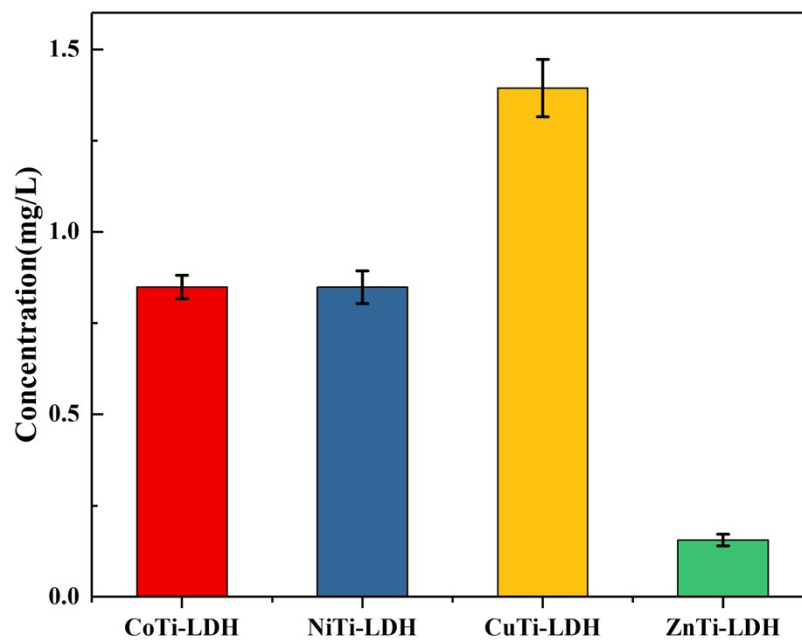

Fig. S9 Metal Leaching concentrations for MTi-LDHs catalysts after 150 min leaching.

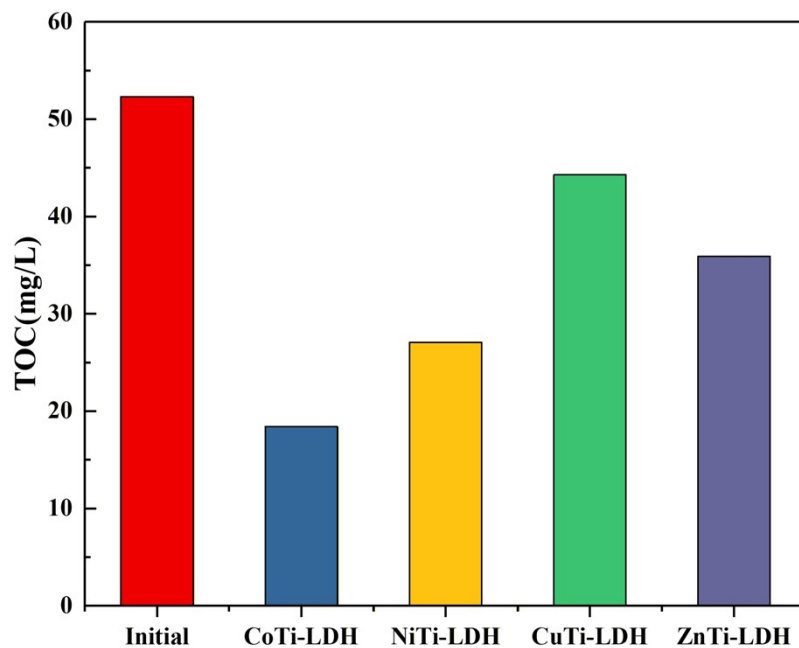

Fig. S10 The TOC concentration of TCH samples treated by MTi-LDHs.

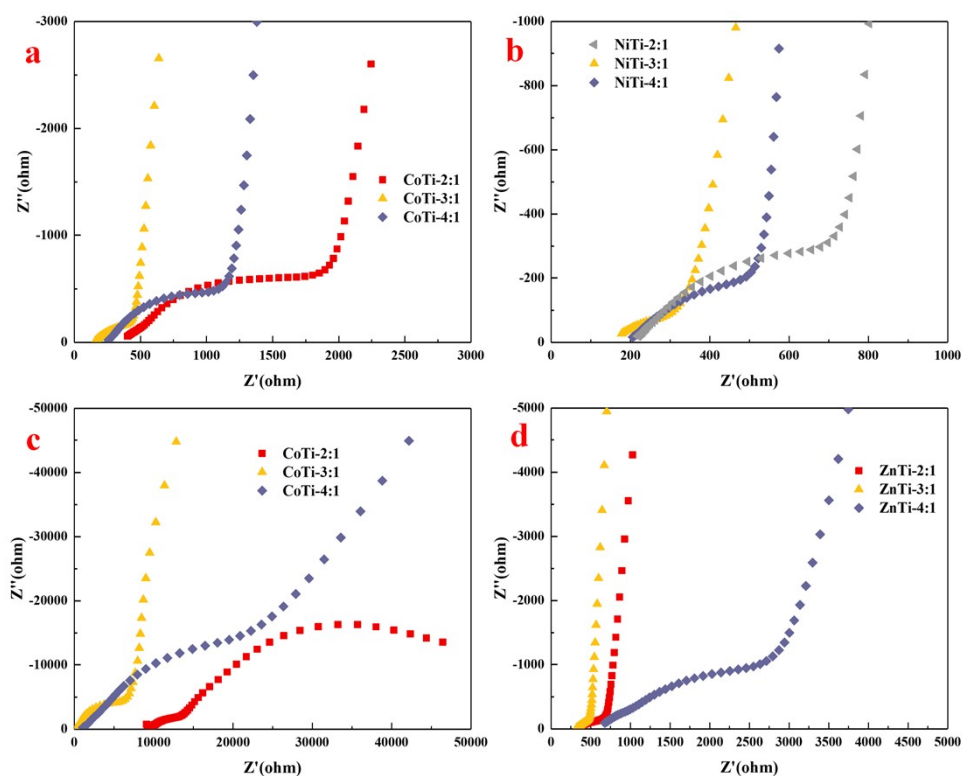

Fig. S11 Nyquist plots of electrochemical impedance spectra (EIS) of MTi-LDHs with different  $M^{2+}$ :Ti (a: CoTi-LDH; b: NiTi-LDH; c: CuTi-LDH; d: ZnTi-LDH).

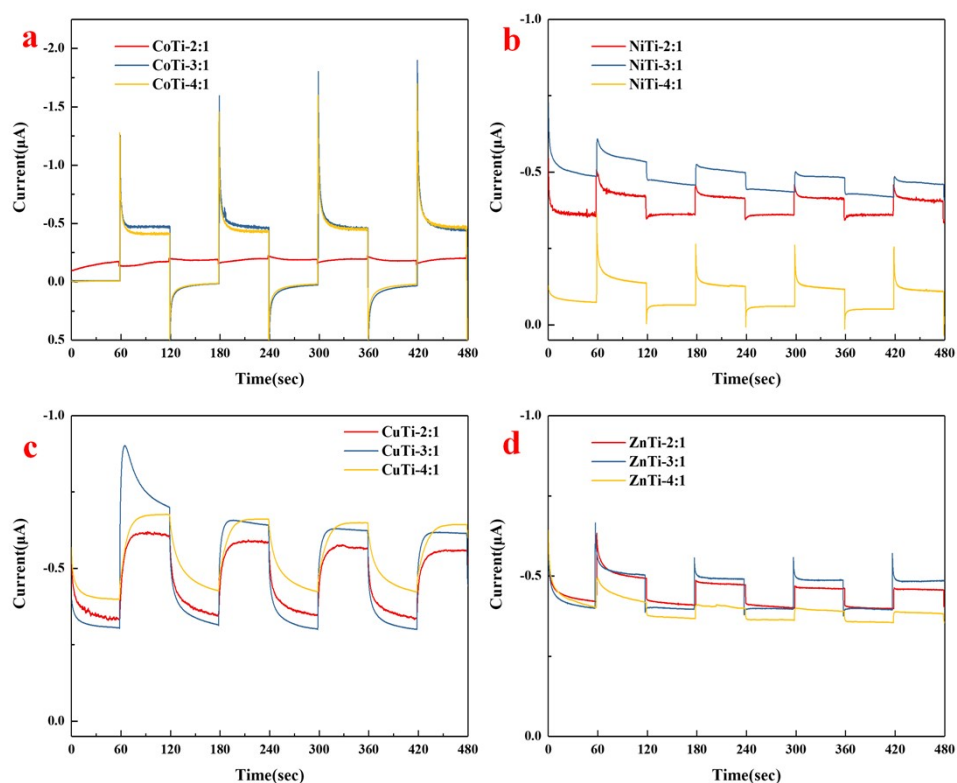

**Fig. S12** Transient photocurrent curves (i-t) for MTi-LDHs with different  $M^{2+}$ :Ti (a: CoTi-LDH; b: NiTi-LDH; c: CuTi-LDH; d: ZnTi-LDH).

**Tables S3** Effect of different scavengers (IPA, BQ, AO, L-His) on the degradation process of MTi-LDHs.

| Condition | Apparent rate constants ( $k, \text{min}^{-1}$ ) |          |          |          |
|-----------|--------------------------------------------------|----------|----------|----------|
|           | CoTi-LDH                                         | NiTi-LDH | CuTi-LDH | ZnTi-LDH |
| Non       | 0.0189                                           | 0.0191   | 0.0151   | 0.0247   |
| IPA       | 0.0185                                           | 0.0184   | 0.0144   | 0.0245   |
| BQ        | 0.0088                                           | 0.0121   | 0.011    | 0.0113   |
| AO        | 0.0176                                           | 0.0132   | 0.013    | 0.0244   |
| L-His     | 0.0082                                           | 0.0093   | 0.0028   | 0.0194   |

**Table S4 The contribution of various pathways on TCH degradation process of MTi-LDHs.**

| Active species      | CoTi-LDH | NiTi-LDH | CuTi-LDH | ZnTi-LDH |
|---------------------|----------|----------|----------|----------|
| $\cdot\text{OH}$    | 0.021    | 0.037    | 0.046    | 0.008    |
| $\cdot\text{O}_2^-$ | 0.534    | 0.366    | 0.272    | 0.542    |
| $\text{h}^+$        | 0.068    | 0.309    | 0.139    | 0.012    |
| $^1\text{O}_2$      | 0.566    | 0.513    | 0.814    | 0.214    |
